# Supplementary material for: Efficient C2H2-selective separation in a microporous Zn(ii)-based metal–organic frameworkviathe dual-ligand strategy
Source: Royal Society of Chemistry journal article supplement (doi:10.1039/d3cc01566a), 2023-01-01
Supplement: d3cc01566a1.pdf [file d3cc01566a1.pdf]

## *Electronic Supplementary Information*

### **Efficient C<sub>2</sub>H<sub>2</sub>-selective separation in a microporous Zn(II)-based metal-organic framework via the dual-ligand strategy**

Fan Yang,<sup>a</sup> Juan-Juan Xue,<sup>a</sup> Guang-Ping Lei,<sup>b</sup> Wen-Yan Zhang,<sup>a</sup> Guo-Ping Yang,<sup>\*a</sup> and Yao-Yu Wang<sup>\*a</sup>

<sup>a</sup> *Key Laboratory of Synthetic and Natural Functional Molecule of the Ministry of Education, Shaanxi Key Laboratory of Physico-Inorganic Chemistry, Xi'an Key Laboratory of Functional Supramolecular Structure and Materials, College of Chemistry and Materials Science, Northwest University, Xi'an 710127, P. R. China*

<sup>b</sup> *Research Center of Shanxi Province for Solar Energy Engineering and Technology, School of Energy and Power Engineering, North University of China, Taiyuan 030051, P. R. China.*

\*Email: [ygp@nwu.edu.cn](mailto:ygp@nwu.edu.cn); [wyaoyu@nwu.edu.cn](mailto:wyaoyu@nwu.edu.cn).

## Content

|                                                                    |    |
|--------------------------------------------------------------------|----|
| <b>Content</b> .....                                               | 2  |
| <b>S1. Materials and General Methods</b> .....                     | 3  |
| <b>S2. Experiment Section and Characterization</b> .....           | 3  |
| <b>S2-1. Synthesis of 1</b> .....                                  | 3  |
| <b>S2-2. Crystallographic Data Collection and Refinement</b> ..... | 4  |
| <b>S3. Gas Adsorption</b> .....                                    | 9  |
| <b>S3-1. Isotheric Heat of Adsorption</b> .....                    | 9  |
| <b>S3-2. Ideal Adsorbed Solution Theory (IAST)</b> .....           | 11 |
| <b>S3-3. Dynamic Gas Breakthrough Experiments</b> .....            | 11 |
| <b>S3-4. GCMC Computational Details</b> .....                      | 12 |
| <b>S4. References of Supplementary Information</b> .....           | 13 |

## S1. Materials and General Methods

All reagents and materials were obtained commercially and used as received without further purification. Elemental analyses of carbon, hydrogen and nitrogen were performed on a PerkinElmer 2400C elemental analyzer. Powder X-ray diffraction (PXRD) data were collected on a Bruker D8 ADVANCE X-ray powder diffractometer (Cu K $\alpha$ ,  $\lambda = 1.5418 \text{ \AA}$ ) with  $2\theta$  ( $5\text{--}50^\circ$ ). Thermogravimetric analyses (TGA) were measured under a nitrogen stream employing the NETZSCH STA 449C microanalyzer thermal analyzer at a heating rate of  $5 \text{ }^\circ\text{C min}^{-1}$ . The gas sorption isotherms were measured on Micrometrics ASAP 2020M sorption equipment. Breakthrough experiments were performed on a Quantachrome dynaSorb BT equipment.

## S2. Experiment Section and Characterization

### S2-1. Synthesis of **1**

A mixture of  $\text{Zn}(\text{NO}_3)_2 \cdot 6\text{H}_2\text{O}$  (29.9 mg, 0.1 mmol),  $\text{H}_4\text{L1}$  (22.5 mg, 0.05 mmol), Adenine (6.7 mg, 0.05 mmol) N,N-dimethylformamide (DMF, 4.0 mL),  $\text{H}_2\text{O}$  (2.0 mL), and  $\text{CH}_3\text{CH}_2\text{OH}$  (1.0 mL) was placed in a 15 mL bomb and heated at  $105 \text{ }^\circ\text{C}$  for 72 h. The yellow block crystals (Fig. S1 and S2) were collected after cooling it to room temperature at a rate of  $10 \text{ }^\circ\text{C h}^{-1}$  (48% yield based on  $\text{H}_4\text{L1}$ ). After three days of the solvent exchange with acetone, adsorbent **1a** was obtained by activating at 373 K under vacuum for 6 h to remove the guest solvents. Anal. Calcd. (found) (%) for  $[(\text{Me})_2\text{NH}_2][\text{Zn}_{2.5}(\text{L1})(\text{Ade})(\text{HCOO})] \cdot (\text{DMF})_2(\text{H}_2\text{O})_3$ : C, 41.78 (41.53); H, 3.49 (3.65); N, 11.47 (11.62).

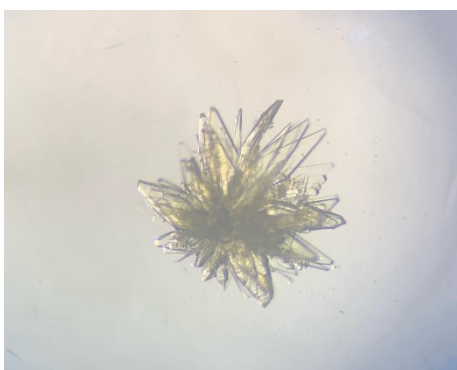

**Fig. S1** Microscopy photograph of crystal morphology for MOF **1**.

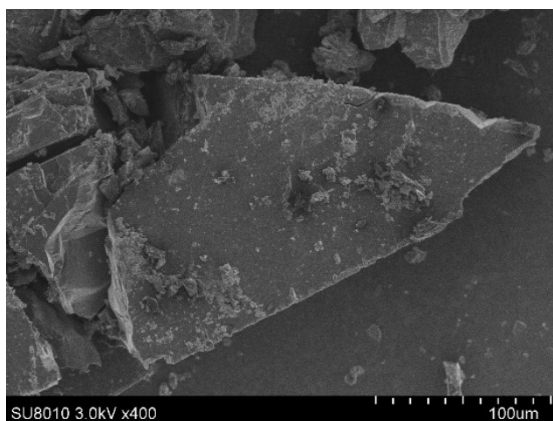

**Fig. S2** SEM image of MOF **1**.

### S2-2. Crystallographic Data Collection and Refinement

The single crystal structure of **1** was measured by single crystal X-ray diffraction (SCXRD) on Bruker SMART APEX II CCD diffractometer equipped with graphite monochromated Mo K $\alpha$  radiation ( $\lambda = 0.71073 \text{ \AA}$ ) via  $\phi/\omega$  scan method. The diffraction data were corrected for Lorentz and polarization effects for empirical absorption based on multiscan. The structures were solved by the direct methods and refined by full-matrix least-squares refinements based on  $F^2$ . Anisotropic thermal parameters were applied to all non-hydrogen atoms. All hydrogen atoms of ligands were calculated and added at ideal positions. The disordered lattice molecules were refined by the SQUEEZE program, and this result is consistent to the results of TGA. Crystallographic calculations were performed using *Olex 2* with 'XL' plug-ins.

**Table S1.** The crystallographic data of **1**.

| Compound              | <b>1</b>                                                                         |
|-----------------------|----------------------------------------------------------------------------------|
| Empirical formula     | C <sub>28</sub> Zn <sub>2.5</sub> N <sub>6</sub> O <sub>12</sub> H <sub>14</sub> |
| Formula mass          | 776.27                                                                           |
| Crystal system        | Triclinic                                                                        |
| Space group           | $P\bar{1}$                                                                       |
| $a$ [Å]               | 13.316(3)                                                                        |
| $b$ [Å]               | 13.775(3)                                                                        |
| $c$ [Å]               | 14.849(3)                                                                        |
| $\alpha$ [°]          | 107.422(4)                                                                       |
| $\beta$ [°]           | 101.816(4)                                                                       |
| $\gamma$ [°]          | 95.038(4)                                                                        |
| $V$ [Å <sup>3</sup> ] | 2511.1(9)                                                                        |
| $Z$                   | 2                                                                                |

|                                                                                                            |                                      |
|------------------------------------------------------------------------------------------------------------|--------------------------------------|
| $\rho$ [g·cm <sup>-3</sup> ]                                                                               | 1.027                                |
| $\mu$ [mm <sup>-1</sup> ]                                                                                  | 1.233                                |
| $F$ [000]                                                                                                  | 763                                  |
| $\theta$ [°]                                                                                               | 1.733 - 25.976                       |
| Reflections collected / unique                                                                             | 13347 / 9553                         |
| Goodness-of-fit on $F^2$                                                                                   | 0.975                                |
| Final $R$ indices [ $I > 2\sigma(I)$ ]                                                                     | $R_1^a = 0.0587$ , $wR_2^b = 0.1540$ |
| $R$ indices (all data)                                                                                     | $R_1^a = 0.0931$ , $wR_2^b = 0.1710$ |
| $^a R_1 = \sum   F_o  -  F_c   / \sum  F_o $ ; $^b wR_2 = [\sum w(F_o^2 - F_c^2)^2 / \sum w(F_o^2)]^{1/2}$ |                                      |

**Table S2.** Selected bond lengths [Å] and angles [°] for **1**.

| Compound 1         |            |                       |            |
|--------------------|------------|-----------------------|------------|
| Zn(1)-Zn(1)#1      | 3.0456(13) | O(9)#1-Zn(1)-O(2)     | 157.06(16) |
| Zn(1)-O(3)         | 2.040(4)   | O(8)-Zn(2)-N(10)#2    | 99.85(15)  |
| Zn(1)-O(4)#1       | 2.058(3)   | O(13)#3-Zn(2)-O(8)    | 101.57(16) |
| Zn(1)-O(2)         | 2.058(4)   | O(13)#3-Zn(2)-N(10)#2 | 108.93(18) |
| Zn(1)-N(12)        | 1.996(4)   | O(5)-Zn(2)-O(8)       | 117.4(2)   |
| Zn(1)-O(9)#1       | 2.040(4)   | O(5)-Zn(2)-N(10)#2    | 129.0(2)   |
| Zn(2)-O(8)         | 1.982(4)   | O(5)-Zn(2)-O(13)#3    | 96.85(18)  |
| Zn(2)-N(10)#2      | 1.988(4)   | O(8)#4-Zn(3)-O(8)#3   | 180.00(12) |
| Zn(2)-O(13)#3      | 1.968(4)   | O(8)#3-Zn(3)-N(20)#7  | 90.17(14)  |
| Zn(2)-O(5)         | 1.934(4)   | O(8)#3-Zn(3)-N(20)#6  | 89.83(14)  |
| Zn(3)-O(8)#4       | 2.148(3)   | O(8)#4-Zn(3)-N(20)#7  | 89.83(14)  |
| Zn(3)-O(8)#3       | 2.148(3)   | O(8)#4-Zn(3)-N(20)#6  | 90.17(14)  |
| Zn(3)-O(1)         | 2.079(4)   | O(1)-Zn(3)-O(8)#3     | 91.15(14)  |
| Zn(3)-O(1)#5       | 2.079(4)   | O(1)#5-Zn(3)-O(8)#3   | 88.85(14)  |
| Zn(3)-N(20)#6      | 2.176(4)   | O(1)#5-Zn(3)-O(8)#4   | 91.15(14)  |
| Zn(3)-N(20)#7      | 2.176(4)   | O(1)-Zn(3)-O(8)#4     | 88.85(14)  |
| O(8)-Zn(3)#8       | 2.148(3)   | O(1)-Zn(3)-O(1)#5     | 180.0      |
| O(8)-C(89)         | 1.267(8)   | O(1)#5-Zn(3)-N(20)#7  | 93.14(16)  |
| O(4)-Zn(1)#1       | 2.058(3)   | O(1)-Zn(3)-N(20)#7    | 86.86(16)  |
| N(10)-Zn(2)#9      | 1.987(4)   | O(1)#5-Zn(3)-N(20)#6  | 86.86(16)  |
| O(13)-Zn(2)#3      | 1.968(4)   | O(1)-Zn(3)-N(20)#6    | 93.14(16)  |
| O(13)-C(36)        | 1.272(6)   | N(20)#6-Zn(3)-N(20)#7 | 180.00(18) |
| O(5)-C(31)         | 1.186(9)   | C(82)-O(3)-Zn(1)      | 135.1(4)   |
| O(9)-Zn(1)#1       | 2.040(4)   | Zn(2)-O(8)-Zn(3)#8    | 110.89(17) |
| O(9)-C(24)         | 1.275(7)   | C(89)-O(8)-Zn(2)      | 115.8(4)   |
| N(20)-Zn(3)#10     | 2.176(4)   | C(89)-O(8)-Zn(3)#8    | 126.6(4)   |
| O(3)-Zn(1)-Zn(1)#1 | 73.55(11)  | C(36)-O(1)-Zn(3)      | 140.1(4)   |
| O(3)-Zn(1)-O(4)#1  | 156.42(15) | C(82)-O(4)-Zn(1)#1    | 121.9(4)   |
| O(3)-Zn(1)-O(2)    | 87.85(16)  | C(25)-N(10)-Zn(2)#9   | 128.5(3)   |

|                      |            |                      |          |
|----------------------|------------|----------------------|----------|
| O(3)-Zn(1)-O(9)#1    | 88.17(15)  | C(28)-N(10)-Zn(2)#9  | 126.7(3) |
| O(4)#1-Zn(1)-Zn(1)#1 | 83.11(11)  | C(28)-N(10)-C(25)    | 104.1(4) |
| O(4)#1-Zn(1)-O(2)    | 87.17(16)  | C(24)-O(2)-Zn(1)     | 139.7(4) |
| O(2)-Zn(1)-Zn(1)#1   | 69.80(12)  | C(28)-N(12)-Zn(1)    | 117.4(3) |
| N(12)-Zn(1)-Zn(1)#1  | 166.03(13) | C(28)-N(12)-C(29)    | 103.5(4) |
| N(12)-Zn(1)-O(3)     | 102.57(16) | C(29)-N(12)-Zn(1)    | 139.0(3) |
| N(12)-Zn(1)-O(4)#1   | 100.91(16) | C(36)-O(13)-Zn(2)#3  | 123.6(3) |
| N(12)-Zn(1)-O(2)     | 96.88(17)  | C(31)-O(5)-Zn(2)     | 117.2(5) |
| N(12)-Zn(1)-O(9)#1   | 106.03(18) | C(24)-O(9)-Zn(1)#1   | 116.3(4) |
| O(9)#1-Zn(1)-Zn(1)#1 | 87.41(12)  | C(25)-N(20)-Zn(3)#10 | 128.9(3) |
| O(9)#1-Zn(1)-O(4)#1  | 87.50(16)  | C(30)-N(20)-Zn(3)#10 | 118.7(3) |

Symmetry codes: #1 -x+1,-y+1,-z+1; #2 x,y-1,z; #3 -x+1,-y,-z; #4 x+1,y+1,z; #5 -x+2,-y+1,-z; #6 -x+1,-y+1,-z; #7 x+1,y,z; #8 x-1,y-1,z; #9 x,y+1,z; #10 x-1,y,z.

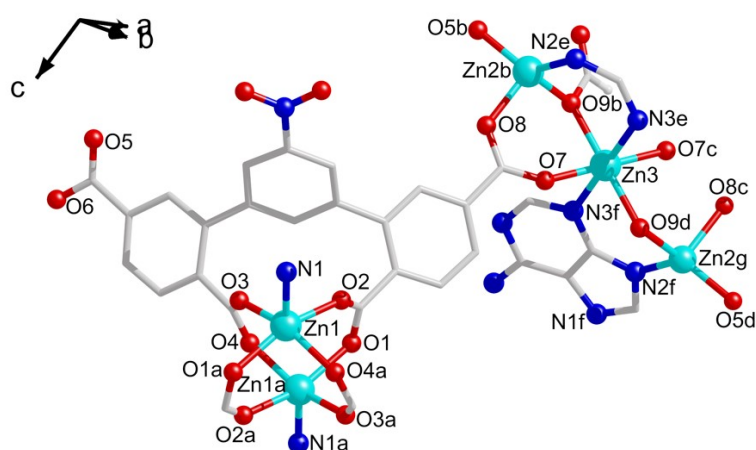

**Fig. S3** Coordination environment of  $Zn^{2+}$  ions in **1**. Symmetric code: a 1-x, 1-y, 1-z; b 1-x, -y, -z; c 2-x, 1-y, -z; d 1+x, 1+y, z; e 1-x, 1-y, -z; f 1+x, y, z.

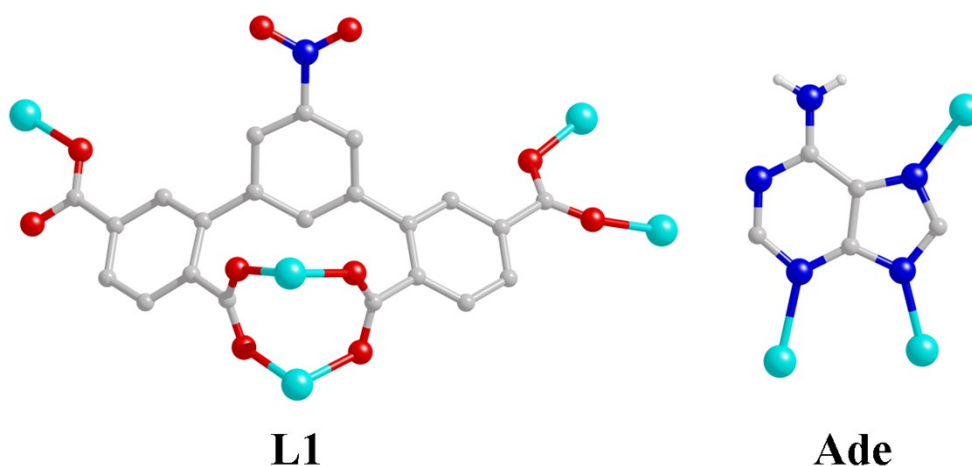

**Fig. S4** Coordination mode of L1 and ancillary ligand Ade in **1**.

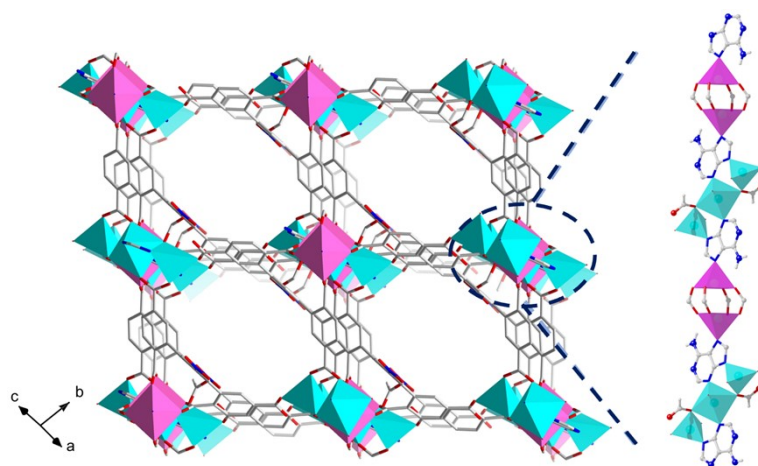

**Fig. S5** 3D porous network viewed along the [101] direction and the Zn-Ade linear chain.

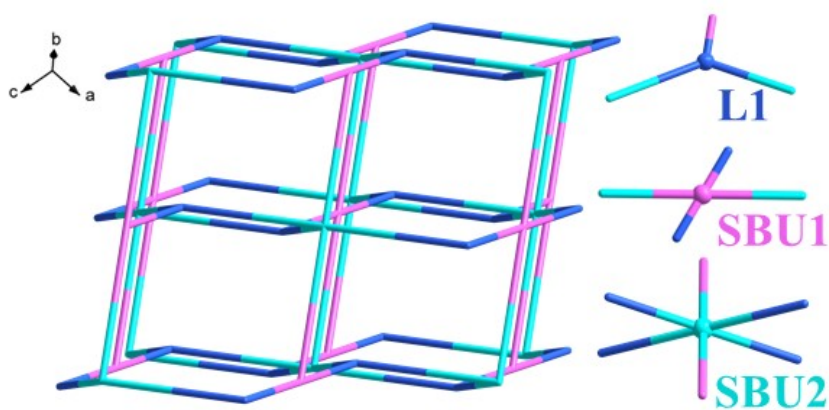

**Fig. S6** Topological net viewed along the [121] direction.

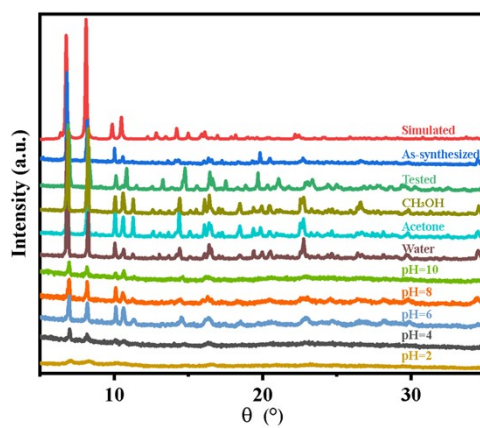

**Fig. S7** PXRD patterns of simulated **1**, as-synthesized **1**, tested **1a** after adsorption, and **1** in different solvents for 12 h.

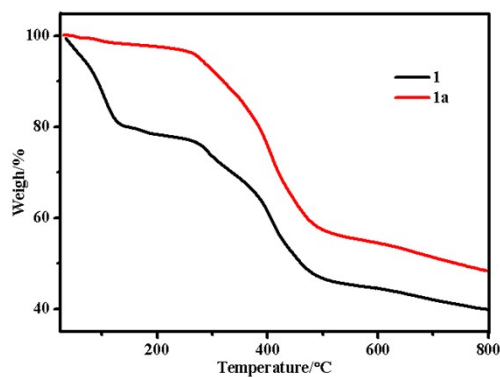

**Fig. S8** TGA curve of as-synthesized **1** and adsorbent **1a**.

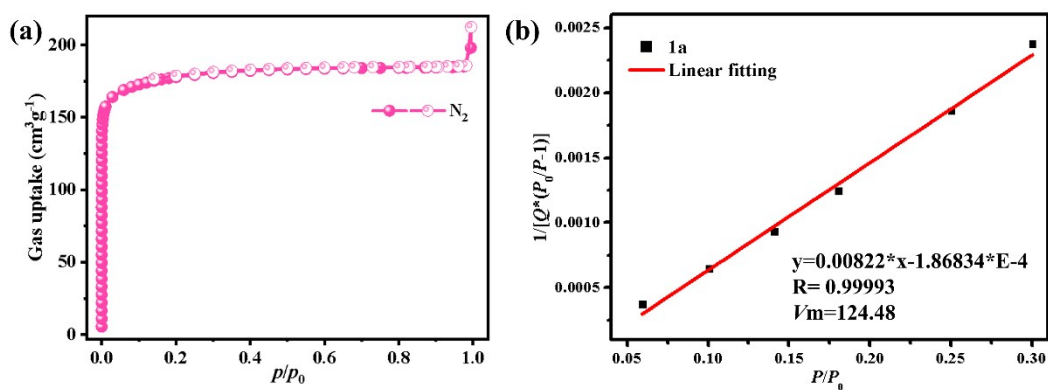

**Fig. S9** (a)  $N_2$  adsorption isotherms at 77 K of **1a**. (b) The BET surface area plot for **1a**.

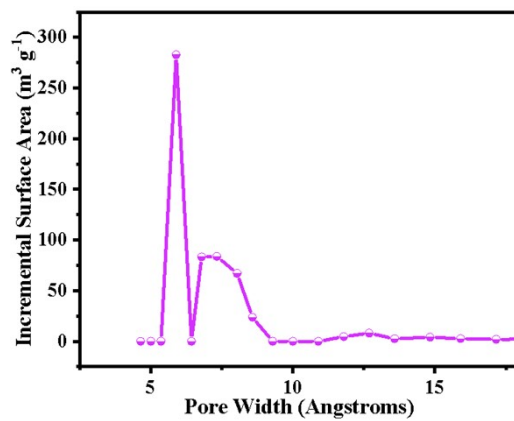

**Fig. S10** The pore size distribution of **1a** (mainly at 5.8 and 7.3 Å), as calculated by Original Density Functional Theory.



### S3. Gas Adsorption

**Table S3.** Comparison of C<sub>2</sub>H<sub>2</sub> uptake amount and storage density of some MOF adsorbents for C<sub>2</sub>H<sub>2</sub>/CO<sub>2</sub> separation at 1 bar.

| Adsorbent                                                | Uptake amount                      | Storage density       | Reference        |
|----------------------------------------------------------|------------------------------------|-----------------------|------------------|
|                                                          | (cm <sup>3</sup> g <sup>-1</sup> ) | (g cm <sup>-3</sup> ) |                  |
| ZJU-50a                                                  | 192                                | 0.24                  | S2               |
| MIL-160                                                  | 191                                | 0.25                  | S3               |
| Ni3-bdc-tpz                                              | 162.1                              | 0.2                   | S4               |
| UPC-200(Al)-F-BIM                                        | 144.5                              | 0.11                  | S5               |
| SNNU-45                                                  | 134.0                              | 0.13                  | S6               |
| UTSA-74a                                                 | 104                                | 0.16                  | S7               |
| <b>1a</b>                                                | <b>100.8</b>                       | <b>0.12</b>           | <b>This work</b> |
| SIFSIX-21-Ni                                             | 90.7                               | 0.14                  | S8               |
| CAU-10-H                                                 | 89.8                               | -                     | S9               |
| ZJU-74a                                                  | 85.7                               | 0.13                  | S10              |
| ZNU-1                                                    | 76.3                               | 0.1                   | S11              |
| SNNU-313-Cl                                              | 76.2                               | 0.13                  | S12              |
| JCM-1                                                    | 75.0                               | 0.12                  | S13              |
| ZU-610                                                   | 72.8                               | 0.13                  | S14              |
| UTSA-300a                                                | 69.5                               | 0.13                  | S15              |
| JNU-1                                                    | 60.0                               | 0.10                  | S16              |
| ZrT-1-tetrazol                                           | 57.7                               | -                     | S17              |
| Ni <sub>3</sub> (pzdc) <sub>2</sub> (7Hade) <sub>2</sub> | 52.9                               | 0.12                  | S18              |
| Cu <sup>I</sup> @UiO-66-(COOH) <sub>2</sub>              | 47.9                               | 0.11                  | S19              |
| CPL-1-NH <sub>2</sub>                                    | 41.2                               | 0.09                  | S20              |

#### S3-1. Isothermic Heat of Adsorption

The adsorbate molecules (CO<sub>2</sub>, CH<sub>4</sub>, C<sub>2</sub>H<sub>2</sub>, C<sub>2</sub>H<sub>4</sub> and C<sub>2</sub>H<sub>6</sub>) and the adsorbent lattice atoms is reflected in the isothermic heat of adsorption ( $Q_{st}$ ) using Virial 2 model, which define as:

$$\ln P = \ln N + 1/T \sum_{i=0}^m a_i N^i + \sum_{i=0}^n b_i N^i \quad (1)$$

$$Q_{st} = -R \sum_{i=0}^m a_i N^i \quad (2)$$

Here,  $Q_{st}$  is the coverage-dependent enthalpy of adsorption,  $P$  is the pressure (mmHg),  $N$  is the adsorbed amount (mg/g),  $T$  is the temperature (K),  $a_i$  and  $b_i$  are virial coefficients, and  $m$  and  $N$  represent the number of coefficients used to describe the isotherms.  $Q_{st}$  is the coverage-dependent

enthalpy of adsorption and  $R$  is the universal gas constant. A virial-type equation (1) was used to fit adsorption data at 273 K and 298 K, and then the values of  $a_0$  through  $a_m$  were used to calculate the isosteric heat of adsorption using equation (2).

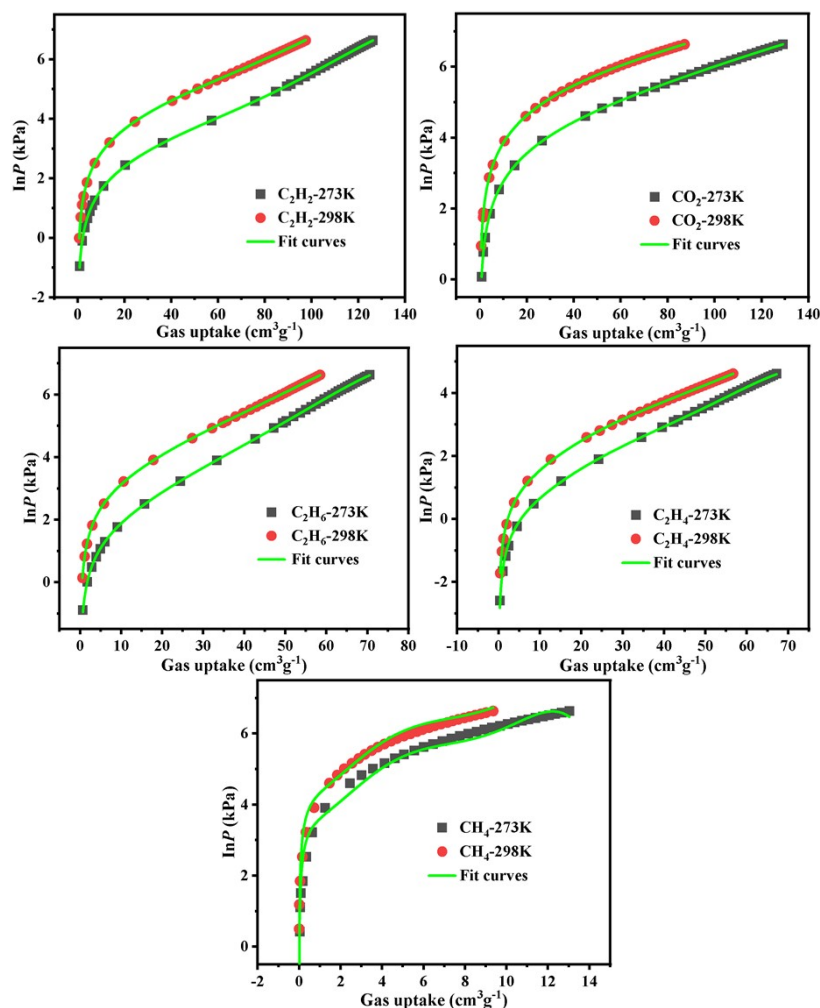

| Model           | $Q_{st}$ (User)                                                  |                    |                    |                    |              |
|-----------------|------------------------------------------------------------------|--------------------|--------------------|--------------------|--------------|
| Equation        | $y=\ln(x)+1/K*(a_0+a_1*x+a_2*x^2+a_3*x^3+a_4*x^4+a_5*x^5)+(b_0)$ |                    |                    |                    |              |
| Plot            | $C_2H_2$ -298K                                                   | $CO_2$ -298K       | $C_2H_6$ -298K     | $C_2H_4$ -298K     | $CH_4$ -298K |
| a0              | -3952.70986                                                      | -3489.14808        | -3633.91412        | -3608.9671         | -2125.6155   |
| a1              | -9.8061                                                          | 6.42307            | 2.99682            | 10.98306           | -364.03645   |
| a2              | 0.15103                                                          | -0.0061            | 0.66592            | 0.81971            | 158.88258    |
| a3              | -0.0016                                                          | $1.49673*10^{-4}$  | -0.0148            | -0.01677           | -28.32673    |
| a4              | $1.64845*10^{-5}$                                                | $-2.59128*10^{-7}$ | $2.21869*10^{-4}$  | $2.51057*10^{-4}$  | 2.23417      |
| b0              | 13.74304                                                         | $-1.06893*10^{-9}$ | $-1.25616*10^{-6}$ | $-1.40382*10^{-6}$ | 12.23594     |
| b1              | 0.038                                                            | 13.13678           | 12.76962           | 12.67893           | -            |
| Reduced Chi-Sqr | $1.26434*10^{-4}$                                                | $1.25635*10^{-4}$  | $1.1543*10^{-4}$   | $1.40661*10^{-4}$  | 0.18227      |
| R-Square (COD)  | 0.99997                                                          | 0.99996            | 0.99997            | 0.99996            | 0.98538      |
| Adj. R-Square   | 0.99995                                                          | 0.99995            | 0.99997            | 0.99995            | 0.93463      |

**Fig. S11** Virial fitting of  $C_2H_2$ ,  $CO_2$ ,  $C_2H_4$ ,  $C_2H_6$ , and  $CH_4$  adsorption isotherms (points) for  $Q_{st}$  calculation on **1a**.

### S3-2. Ideal Adsorbed Solution Theory (IAST)

The experimental measured loadings for pure CO<sub>2</sub>, CH<sub>4</sub>, C<sub>2</sub>H<sub>2</sub>, C<sub>2</sub>H<sub>4</sub> and C<sub>2</sub>H<sub>6</sub> (measured at 273 and 298 K) in samples were fitted with a dual Langmuir-Freundlich (L-F) model (equation 3):

$$q = \frac{a_1 * b_1 * p^{c_1}}{1 + b_1 * p^{c_1}} + \frac{a_2 * b_2 * p^{c_2}}{1 + b_2 * p^{c_2}} \quad (3)$$

Where  $q$  and  $p$  are adsorbed amounts per mass of adsorbent (mmol/g) and pressures of component  $i$  (kPa), respectively.

IAST calculations of adsorption selectivity for binary mixtures defined by equation 4:

$$S_{ij} = \frac{x_i * y_j}{x_j * y_i} \quad (4)$$

Where  $x_i$  and  $x_j$  are the molar loadings in the adsorbed phase in equilibrium with the bulk gas phase with partial pressures  $y_i$  and  $y_j$ . We calculate the values of  $x_i$  and  $x_j$  using IAST of Myers and Prausnitz.

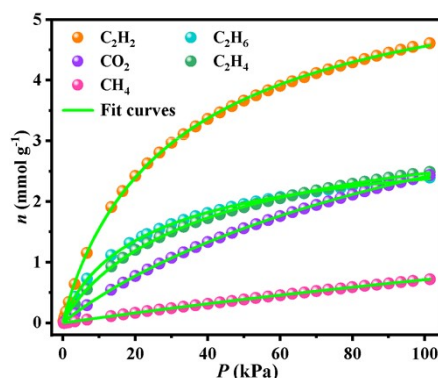

| Model           | LF (User)                           |                                     |                                     |                                    |                                    |
|-----------------|-------------------------------------|-------------------------------------|-------------------------------------|------------------------------------|------------------------------------|
| Equation        | $A1*b1*x^{c1}/(1+b1*x^{c1})$        |                                     |                                     |                                    |                                    |
| Plot            | C <sub>2</sub> H <sub>6</sub> -298K | C <sub>2</sub> H <sub>4</sub> -298K | C <sub>2</sub> H <sub>2</sub> -298K | CO <sub>2</sub> -298K              | CH <sub>4</sub> -298K              |
| A1              | 3.1593 ± 0.03513                    | 3.69706 ± 0.05025                   | 6.23973 ± 0.06375                   | 5.86577 ± 0.08138                  | 4.43214 ± 0.44792                  |
| b1              | 0.05671 ± 0.0012                    | 0.0324 ± 6.08126*10 <sup>-4</sup>   | 0.04029 ± 7.93605*10 <sup>-4</sup>  | 0.00886 ± 5.33928*10 <sup>-5</sup> | 0.00198 ± 1.40198*10 <sup>-4</sup> |
| c1              | 0.86242 ± 0.01183                   | 0.89557 ± 0.01108                   | 0.91443 ± 0.01064                   | 0.94839 ± 0.00488                  | 0.99325 ± 0.01101                  |
| Reduced Chi-Sqr | 1.60115*10 <sup>-4</sup>            | 1.17711*10 <sup>-4</sup>            | 4.07429*10 <sup>-4</sup>            | 1.46286*10 <sup>-5</sup>           | 4.84442*10 <sup>-6</sup>           |
| R-Square (COD)  | 0.99975                             | 0.99984                             | 0.99985                             | 0.99998                            | 0.99991                            |
| Adj. R-Square   | 0.99974                             | 0.99983                             | 0.99984                             | 0.99998                            | 0.99991                            |

**Fig. S12** Single-site Langmuir-Freundlich fitting (red lines) of C<sub>2</sub>H<sub>2</sub>, CO<sub>2</sub>, C<sub>2</sub>H<sub>4</sub>, C<sub>2</sub>H<sub>6</sub>, and CH<sub>4</sub> adsorption isotherms (black points) on **1a** at 298 K.

### S3-3. Dynamic Gas Breakthrough Experiments

The mixed-gas breakthrough separation experiment was measured at 296 K using a lab scale fix-bed reactor. The as-synthesized sample 0.985 g of **1a** (985 mg) was degasified in-situ in the column through vacuuming at 333 K for 6 h before the measurement. A helium flow (10 mL/min) was used after the activation process to purge the adsorbent. The flow of He was then turned off, while a gas mixture of 50% C<sub>2</sub>H<sub>2</sub>, 50% CO<sub>2</sub> at 1 mL/min was allowed to flow into the column. The outlet composition was continuously monitored by gas chromatograph until complete breakthrough was achieved. On the basis of the gas balance, the gas adsorption capacities can be determined as follows:

$$q_i = \frac{C_i V}{22.4 \times m} \times \int_0^t \left(1 - \frac{F}{F_0}\right) dt \quad (5)$$

Where  $q_i$  is the equilibrium adsorption capacity of gas  $i$  (mmol/g),  $C_i$  is the feed gas concentration,  $V$  is the volumetric feed flow rate (cm<sup>3</sup>/min),  $t$  is the adsorption time (min),  $F_0$  and  $F$  are the inlet and outlet gas molar flow rates, respectively, and  $m$  is the mass of the adsorbent (g).

The separation factor ( $\alpha$ ) of the breakthrough experiment is determined as:

$$\alpha = \frac{q_1 y_2}{q_2 y_1} \quad (6)$$

In which  $y_i$  is the molar fraction of gas  $i$  in the gas mixture.

### S3-4. GCMC Computational Details

Grand canonical Monte Carlo (GCMC) simulations were modeled for the gas adsorption by using RASPA.<sup>1</sup> The 2×2×2 unit cell of framework with rigid structure was employed, and the  $Q_{eq}$  method was used to fit the partial charges of all atoms in the framework. The interaction energies between the gas molecules and framework were computed through the Coulomb and Lennard-Jones (LJ) potentials. All parameters of the host-guest interaction behavior were modeled with the universal force field (UFF). A cutoff distance of 12 Å was used for LJ interactions, and Ewald summation was employed to compute the Coulombic interactions. The 5×10<sup>6</sup> maximum loading steps and 5×10<sup>6</sup> production steps were employed for each run.

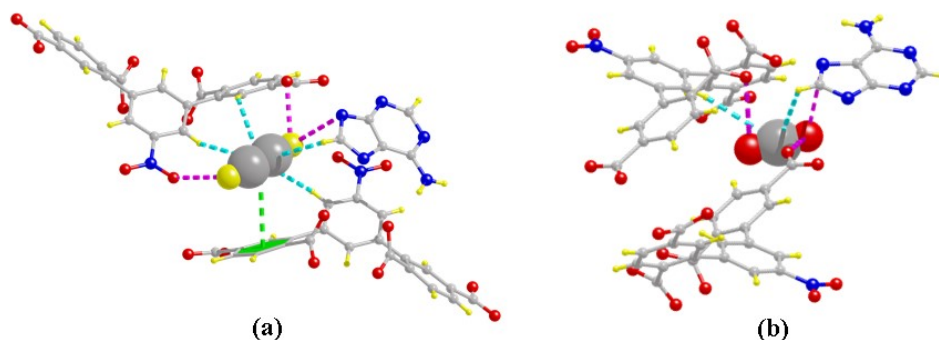

**Fig. S13** Optimum adsorption sites for  $C_2H_2$  (a) and  $CO_2$  (b) in **1a**.

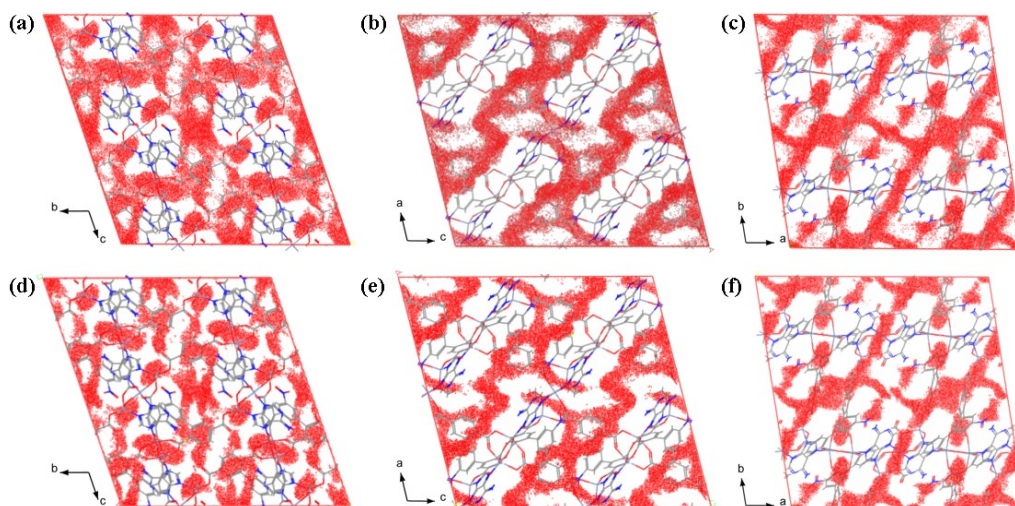

**Fig. S14** Simulated probability density distribution profile of  $C_2H_2$  (a-c) and  $CO_2$  (d-f) in **1a** by GCMC simulation at 100 kPa and 298 K. (Note:  $C_2H_2$  was more concentrated in the voids of the adsorbent than  $CO_2$ , which was compatible with experimental results.)

#### S4. References of Supplementary Information

1. D. Dubbeldam, S. Calero, D. E. Ellis and R. Q. Snurr, *Mol. Simul.*, 2016, **42**, 81-101.
2. K. Shao, H. M. Wen, C. C. Liang, X. Xiao, X. W. Gu, B. Chen, G. Qian and B. Li, *Angew. Chem., Int. Ed.*, 2022, **61**, e202211523.
3. Y. Ye, S. Xian, H. Cui, K. Tan, L. Gong, B. Liang, T. Pham, H. Pandey, R. Krishna, P. C. Lan, K. A. Forrest, B. Space, T. Thonhauser, J. Li and S. Ma, *J. Am. Chem. Soc.*, 2021, **144**, 1681-1689.
4. H. Yang, Y. Chen, C. Dang, A. N. Hong, P. Feng and X. Bu, *J. Am. Chem. Soc.*, 2022, **144**, 20221-20226.
5. W. Fan, S. Yuan, W. Wang, L. Feng, X. Liu, X. Zhang, X. Wang, Z. Kang, F. Dai, D. Yuan, D. Sun and H.-C. Zhou, *J. Am. Chem. Soc.*, 2020, **142**, 8728-8737.
6. P. Li, Y. Wang, Y. Y. Xue, H. P. Li, Q. G. Zhai, S. N. Li, Y. C. Jiang, M. C. Hu and X. Bu, *Angew. Chem., Int. Ed.*, 2019, **131**, 13724-13729.
7. F. Luo, C. Yan, L. Dang, R. Krishna, W. Zhou, H. Wu, X. Dong, Y. Han, T.-L. Hu, M. O’Keeffe, L. Wang, M. Luo, R.-B. Lin and B. Chen, *J. Am. Chem. Soc.*, 2016, **138**, 5678-5684.
8. N. Kumar, S. Mukherjee, N. C. Harvey-Reid, A. A. Bezrukov, K. Tan, V. Martins, M. Vandichel, T. Pham, L. M. van Wyk, K. Oyekan, A. Kumar, K. A. Forrest, K. M. Patil, L. J.

- Barbour, B. Space, Y. Huang, P. E. Kruger and M. J. Zaworotko, *Chem*, 2021, **7**, 3085-3098.
9. J. Pei, H. M. Wen, X. W. Gu, Q. L. Qian, Y. Yang, Y. Cui, B. Li, B. Chen and G. Qian, *Angew. Chem., Int. Ed.*, 2021, **60**, 25068-25074.
  10. J. Pei, K. Shao, J. X. Wang, H. M. Wen, Y. Yang, Y. Cui, R. Krishna, B. Li and G. Qian, *Adv. Mater.*, 2020, **32**, 1908275.
  11. L. Wang, W. Sun, Y. Zhang, N. Xu, R. Krishna, J. Hu, Y. Jiang, Y. He and H. Xing, *Angew. Chem., Int. Ed.*, 2021, **60**, 22865-22870.
  12. H. P. Li, Z. D. Dou, Y. Xiao, G. J. Fan, D. C. Pan, M. C. Hu and Q. G. Zhai, *Nanoscale*, 2022, **14**, 18200-18208.
  13. J. Lee, C. Y. Chuah, J. Kim, Y. Kim, N. Ko, Y. Seo, K. Kim, T. H. Bae and E. Lee, *Angew. Chem., Int. Ed.*, 2018, **130**, 7995-7999.
  14. J. Cui, Z. Qiu, L. Yang, Z. Zhang, X. Cui and H. Xing, *Angew. Chem., Int. Ed.*, 2022, **134**, e202208756.
  15. R. B. Lin, L. Li, H. Wu, H. Arman, B. Li, R. G. Lin, W. Zhou and B. Chen, *J. Am. Chem. Soc.*, 2017, **139**, 8022-8028.
  16. H. Zeng, M. Xie, Y. L. Huang, Y. Zhao, X. J. Xie, J. P. Bai, M. Y. Wan, R. Krishna, W. Lu and D. Li, *Angew. Chem., Int. Ed.*, 2019, **58**, 8515-8519.
  17. W. Fan, S. B. Peh, Z. Zhang, H. Yuan, Z. Yang, Y. Wang, K. Chai, D. Sun and D. Zhao, *Angew. Chem., Int. Ed.*, 2021, **60**, 17338-17343.
  18. Z. Zhang, S. B. Peh, Y. Wang, C. Kang, W. Fan and D. Zhao, *Angew. Chem., Int. Ed.*, 2020, **132**, 19089-19094.
  19. L. Zhang, K. Jiang, L. Yang, L. Li, E. Hu, L. Yang, K. Shao, H. Xing, Y. Cui, Y. Yang, B. Li, B. Chen and G. Qian, *Angew. Chem., Int. Ed.*, 2021, **133**, 16131-16138.
  20. L. Yang, L. Yan, Y. Wang, Z. Liu, J. He, Q. Fu, D. Liu, X. Gu, P. Dai, L. Li and X. Zhao, *Angew. Chem., Int. Ed.*, 2021, **133**, 4620-4624.
